# Supplementary material
Source: publisher figshare collection journal article supplement (https://frontiersin.figshare.com/ndownloader/files/26631734)
Supplement: Supplementary file [file 26631734]

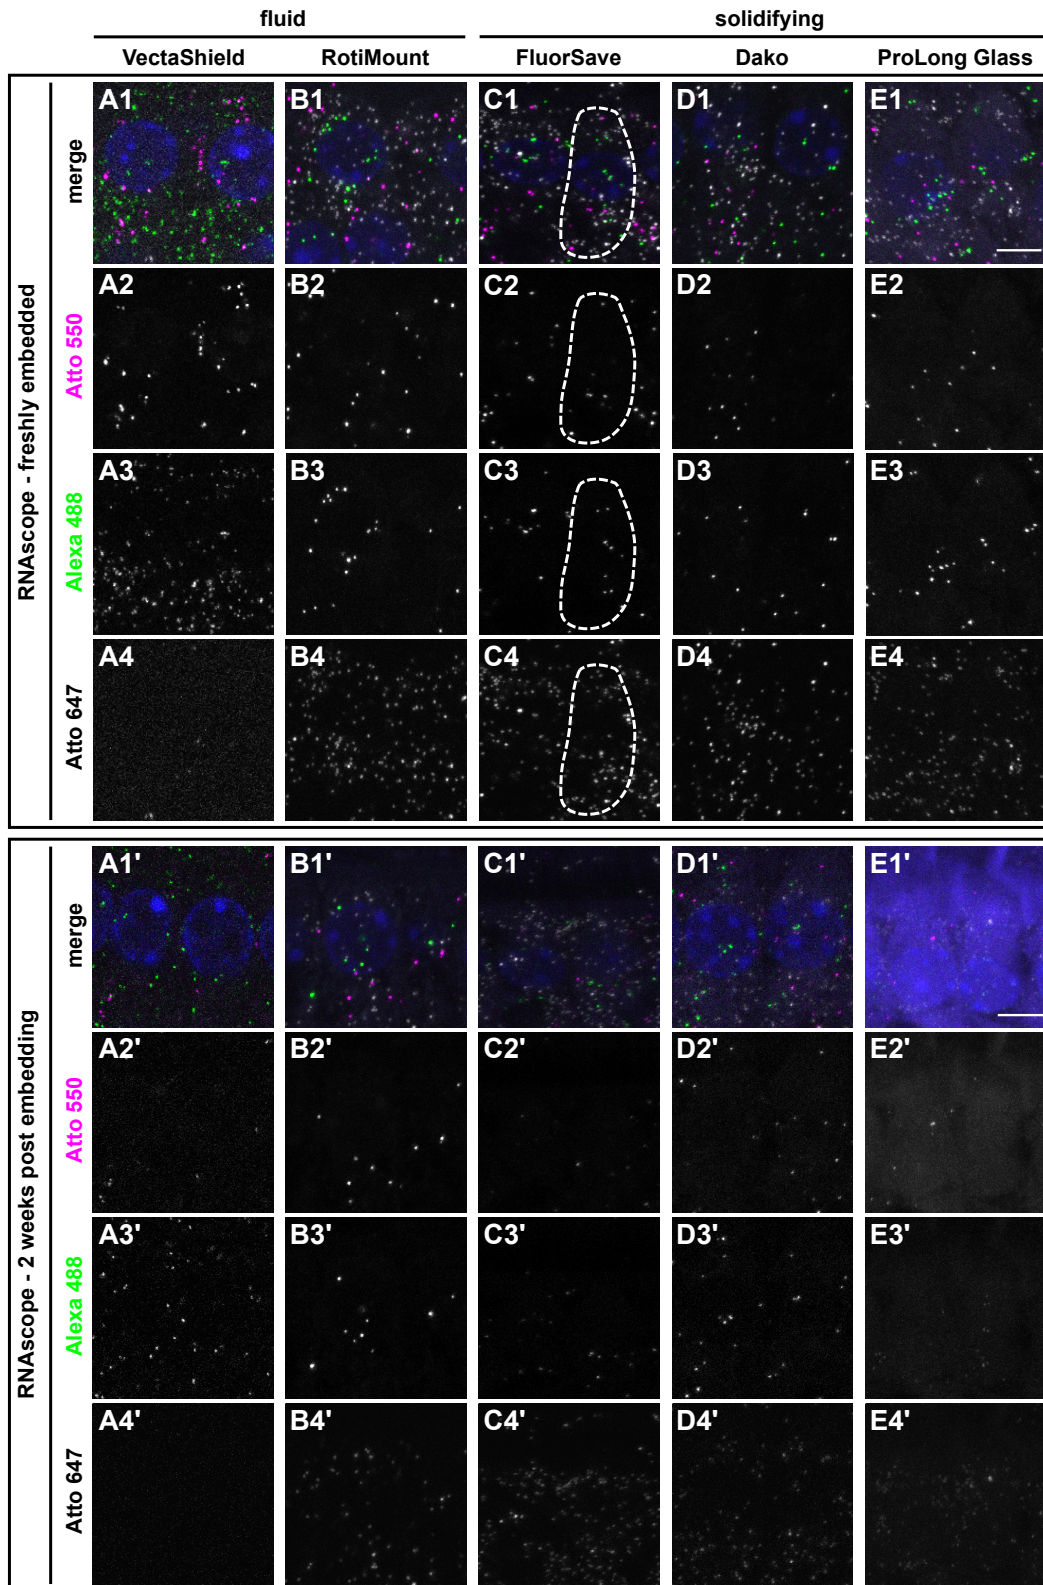

**Supplementary Figure 1.** Effect of different embedding media on RNAscope® quality. **Upper panel:** Whole-mount RNAscope® images taken shortly after (0-3 days) embedding with fluid phase embedding media VectaShield (**A**) or RotiMount (**B**) or with solidifying embedding media FluorSave (**C**), Dako (**D**) or ProLong Glass Antifade (**E**). Projections of confocal images of two IHCs are shown, the shape of a representative IHC is indicated by a dotted line in **C**. Positive control probes detected mRNA of *ppib* in the Atto-550 (**B2-E2**), *polr2a* in the Alexa-488 (**B3-E3**), and *ubc* in the Atto-647 channel (**B4-E4**), except for VectaShield (Atto-550: *polr2a*, **A2**; Alexa-488: *ubc*, **A3**; Alexa-647, *ppib*, **A4**). Nuclei in merged images are labeled

with DAPI (**A1-E1**). Tissue morphology was well preserved with all embedding media. Note that Atto-647 fluorescence was quenched by VectaShield (**A4**) and reduced by ProLong Glass (**E4**) when compared to the other embedding media (**B4-D4**). **Lower panel:** Specimens were re-analyzed 2-3 weeks later for preservation of fluorescence by the different embedding media. Images were taken using identical settings as before. Atto-550 fluorescence was reduced in all embedding media (**A2', C2'-E2'**) except RotiMount (**B2'**). Alexa-488 fluorescence was reduced in FluorSave (**C3'**) and to a great extent in ProLong Glass (**E3'**), but mostly preserved in the other media (**A3', B3', D3'**). Atto-647 fluorescence was absent in VectaShield (**A4'**) and reduced in the remaining embedding media (**B4'-E4'**), where, however, fluorescence could still be analyzed by increasing the gain settings of the microscope (not shown). Note the high background labeling for DAPI and, to a lower degree, Atto-550 and Alexa-488 in ProLong Glass (**E1'-E3'**). Scale bars: 5  $\mu$ m.
